# Supplementary material
Source: Springer Nature journal article supplement (https://www.springermedizin.de/resource/supplementary/12958_2011_976_MOESM7_ESM.pdf/9566546)

**a)**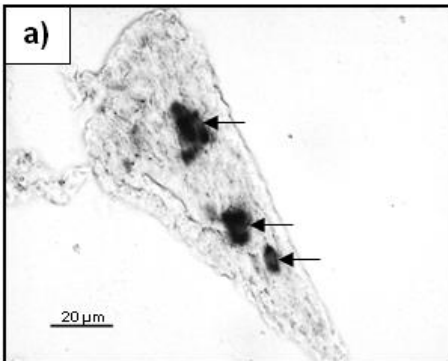**b)**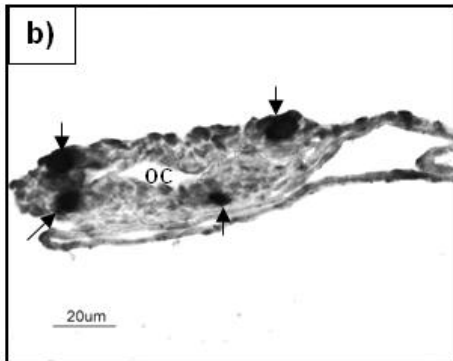**c)**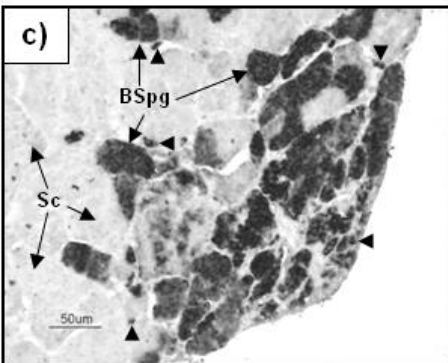**d)**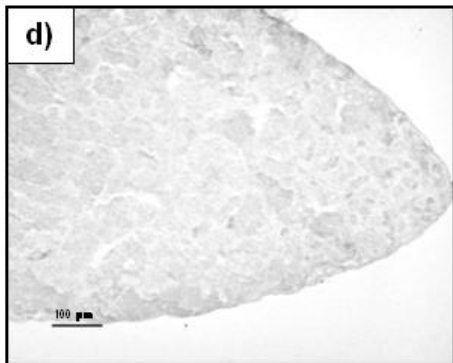

Supplement: MOESM7 [file 9566546]
